# Supplementary material for: Multipotency of Adipose-Derived Stem Cells from Cynomolgus Monkeys
Source: Research Square preprint supplement (doi:10.21203/rs.3.rs-6817956/v1), 2025-06-10
Supplement: Supplementary file 1 [file e20b7f2990af73475eb2b586.docx]

**Supplementary Data**

Supplementary Table1:

Cynomolgus monkey adipose-derived stem cells (ADSC) isolated information

| Fat Number | Isolation time | Sex | Age | Body weight | Isolated Fat |
| --- | --- | --- | --- | --- | --- |
| ADSC1 | 26,March. 2016 | Male | 8 year | 7.3kg | 5 gram |
| ADSC2 | 26,March. 2016 | Female | 10 year | 9.5kg | 6 gram |
| ADSC3 | 26,March. 2016 | Male | 6 year | 6.2kg | 8 gram |
| ADSC4 | 16,Nov. 2016 | Male | 16 year | 16.6kg | 9.5 gram |
| ADSC5 | 16,Nov. 2016 | Female | 9 year | 10.3kg | 10 gram |
| ADSC6 | 16,Nov. 2016 | Male | 7 year | 8.2kg | 8.5 gram |

Supplementary Table 2:

Primers used for Cynomolgus ADSC cells characterization and differentiation

Gene Forward Reverse

CD 10 TTGTAAGCAGCCTCAGCCG TTGTCCACCTTTTCTCGGAG

CD 13 GCCGTGTGCACAATCATCGCACT CACCAGGGAGCCCTTGAGGTG

CD 59 ACACTCTACTACATGTGACTG TGCAAAAGTCAGCCTATGCC

Vimentin CCAACGAGAAGGTGGAATTGCAGG GCCATCTTTACATTGAGCAGGTCC

BMP-6 CTCGGGGTTCATAAGGTGAA ACAGCATAACATGGGGCTTC

Sox2 ACATGATGGAGACGGAGCTGAAGC GCTGCTCCTGCATCATGCTGTAGC

AP AAGACCCCAGTTACTGGCGACAGC CCTTTCCGATGGCCTCATCCATCT

OCT4 GAAGCTGGAGAAGGAGAAGC GAACATGTGTAAGCTGCGGCCCTTG

Nanog CAAAGGCAAACAACCCACTT CTGGATGTTCTGGGTCTGGT

hTERT GACCATCTTTCTGGGTTCCA ACACTCATCAGCCAGTGCAG

Telomerase CTGCGTGTGCGTGCTCTGGAC CACCTCAGCAAACAGCTTGTTCTC

BMP2 CTGTCTTCTAGTGTTGCTGCTTCC TTCTGAGTCACTAACCTGGTGTCC

BMP4 ACACTGTGAGGAGTTTCCATCACG TTCCAGCCCACGTCACTGAAGTCC

VEGF TTTCTGCTCTCTTGGGTGCACTGG TGGCTTGTCACATCTGCAAGTACG

CD 166 AGATACCATTATCATCATACCTTGCCGACT TGTCTTTGTATTCGTGTACATCGTCG

Collagen I GCCAGGATGTCCGGCAACCAG TCCCCTCTGGGTCCTTGTTC

Collagen X GGTATAGCAGTAAGAGGAGAGCA AGGACTTCCGTAGCCTGGTTT

Pax6 CCATGTGGGCCGAACAG TGGTGAAGCTGGGCATAGG

Olig2 CCAGCAACAATTAACTTAGG CTTAGAAGAGACGCAGAG

NeuroD1 ACGCAGAAGGCAAGGTGTCC GTTCCTCGTCCTGAGAACTG

MAP-2 TGGAGGAAGCCTCGAAGATG TCTGTGCCTTGCATGTCCTT

LMX1A GCAGGAAGGTGAGAGAGACT TCCCACCACCATTTGTCTGAG

Ngn2 TGGCTGGCATCTGCTCTATT TAGGCATTGTGACGAATCTG

NURR1 AGTGGTTCGCACAGACAGTT CGCCTGGAACCTGGAATAGT

EN1 GATCGTCCATCCTCCGGTCC ATGTAGCGGTTTGCCTGGAA

TH AGCTGATTGCTGAGATCGCC GGTGTAGACCTCCTTCCAGGT

GAPDH ACCACAGTCCATGCCATCAC TCCACCACCCTGTTGCTGTA

GAPDH1 TGGAAAAACCTGCCAAGTACG GTCATACCAGGAAATGAGCTTGAC


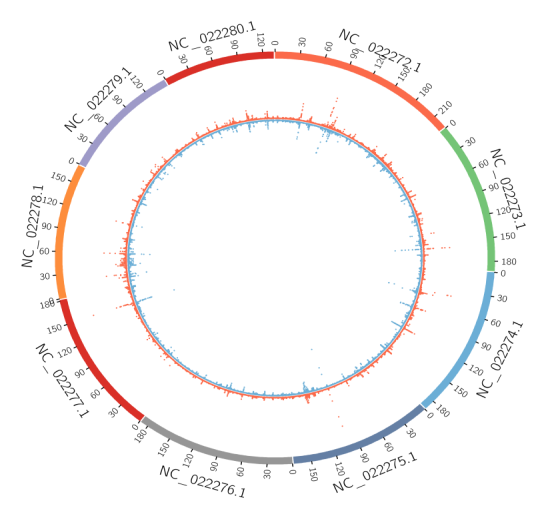

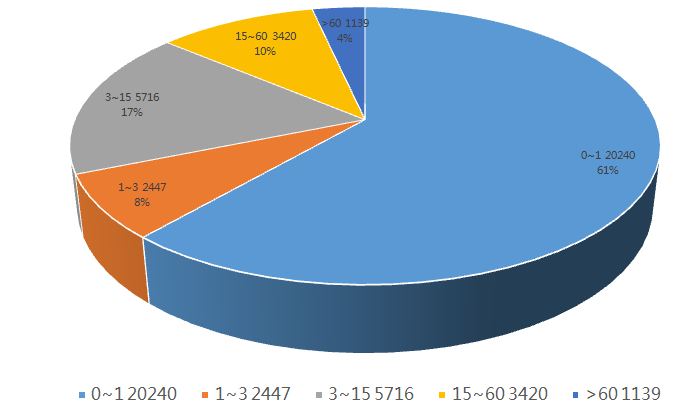


Supplementary Fig.1

Reads, genes and the genome of Cynomolgus monkey ADSCs transcriptome

Right: The Total Mapped Reads: the outermost circle shows the chromosomes of the genome. The red part of the circle inside represents the number of Reads aligned to the positive chain, The blue portion represents the number of Reads that are aligned to the negative strand.

Left: The Total Mapped Reads percentage in clean Reads were recorded in pie chart.


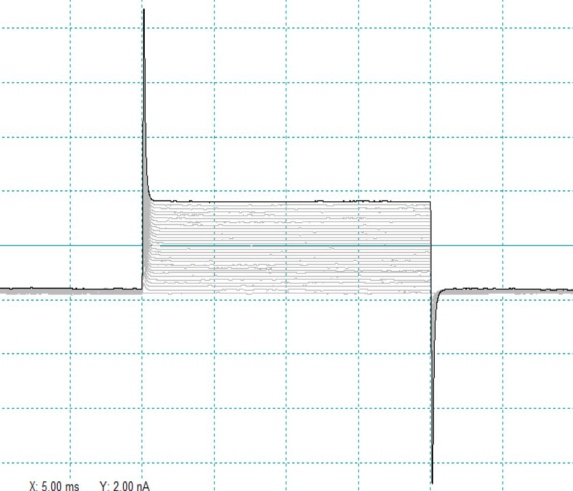

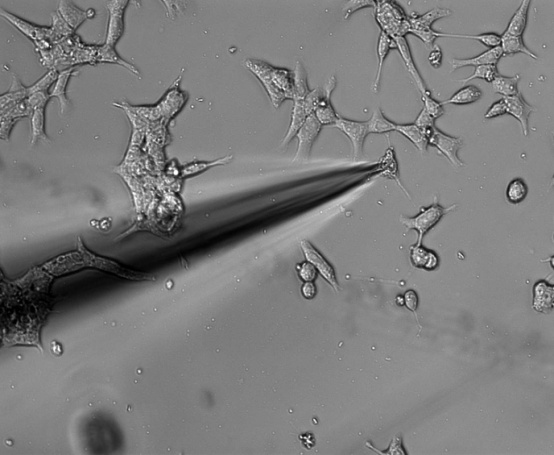


|  |  |  |  |  |  |  |
| --- | --- | --- | --- | --- | --- | --- |

Supplementary Fig.2

Cynomolgus ADSC action potential test.

The sodium currents were not detected in this experiment (n=13). right X-axis is time, Y-axis is Amplitude, one green square means 5.00ms and 2.00nA, left is anchored the cells for measuring.


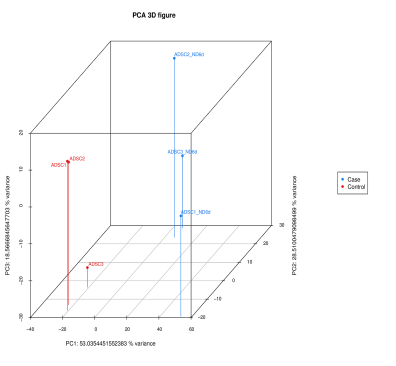


Supplementary Fig. 3

Principal component analysis (PCA) between samples.


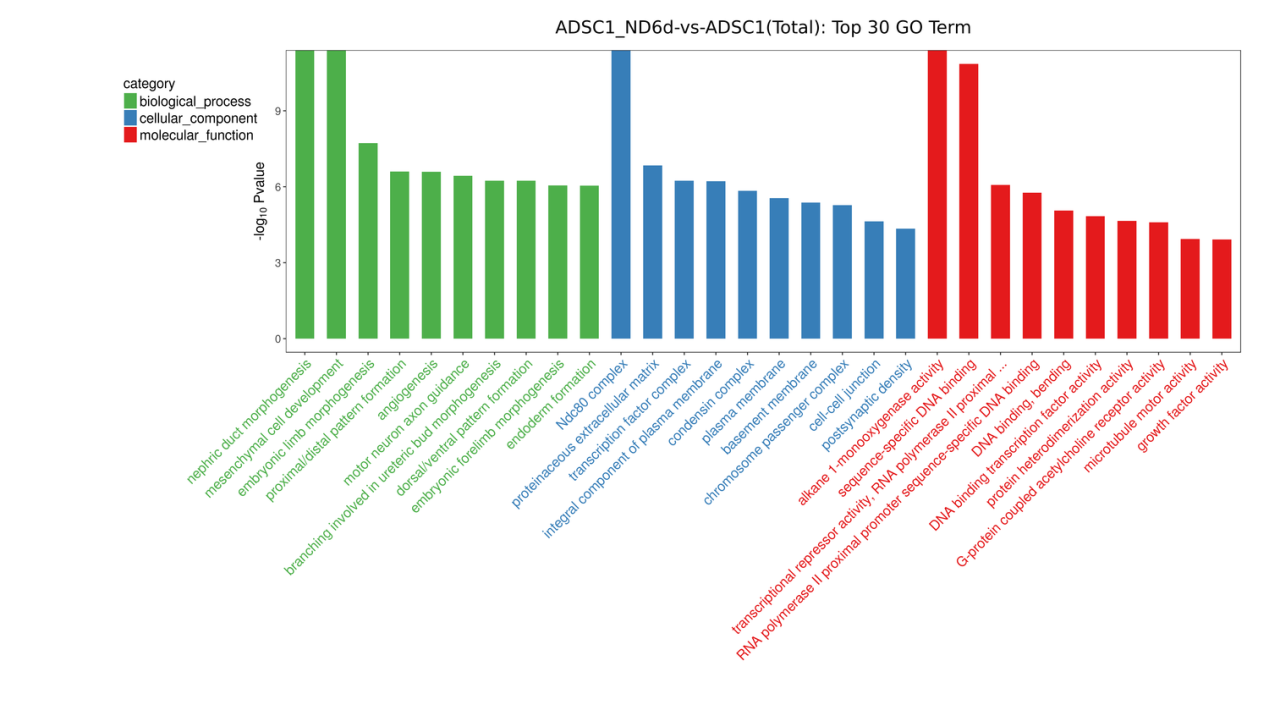

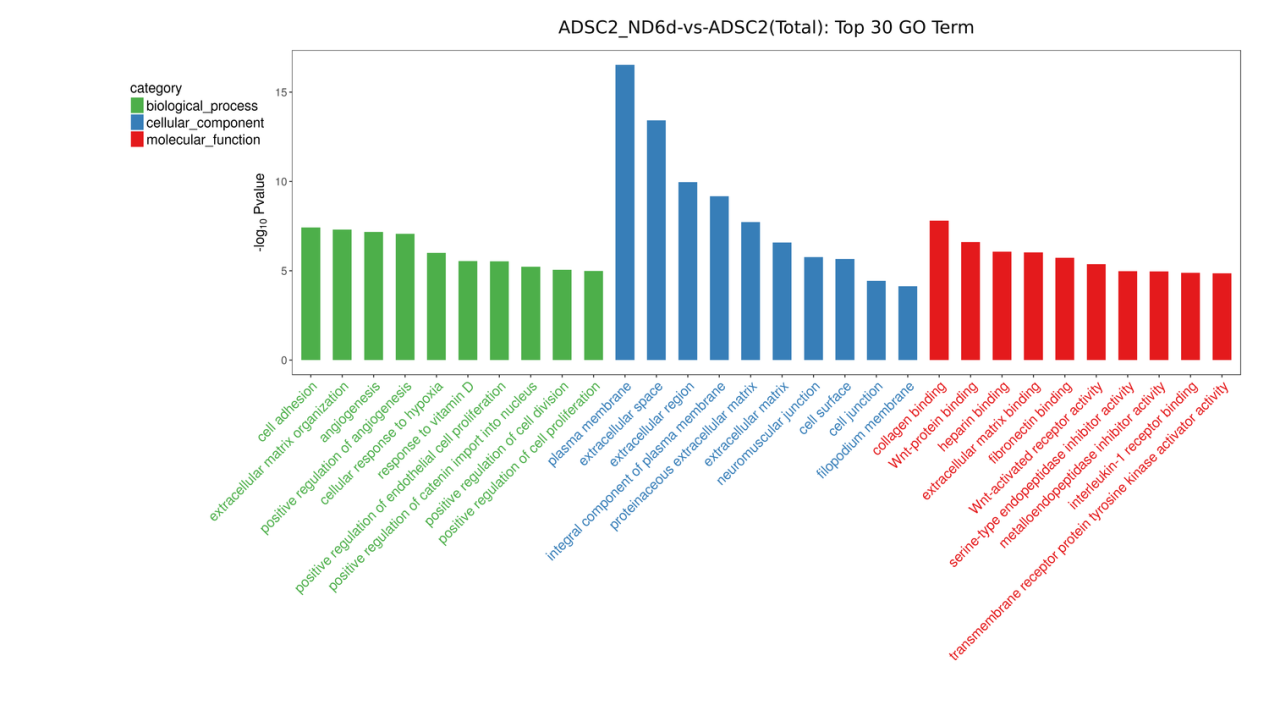

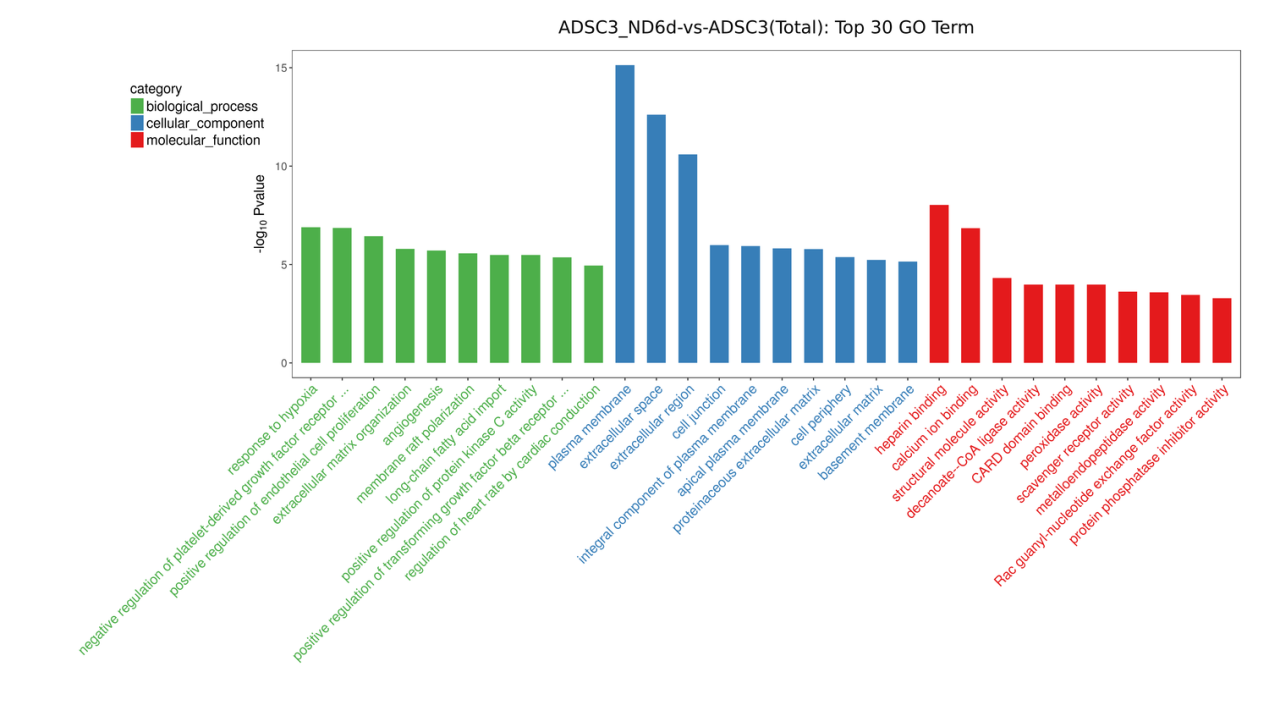


Supplementary Fig 4.

GO enrichment analysis top30 differentially expressed genes in the figure5C, the X coordinate is the name of the GO entry and the Y coordinate is -log10 pvalue


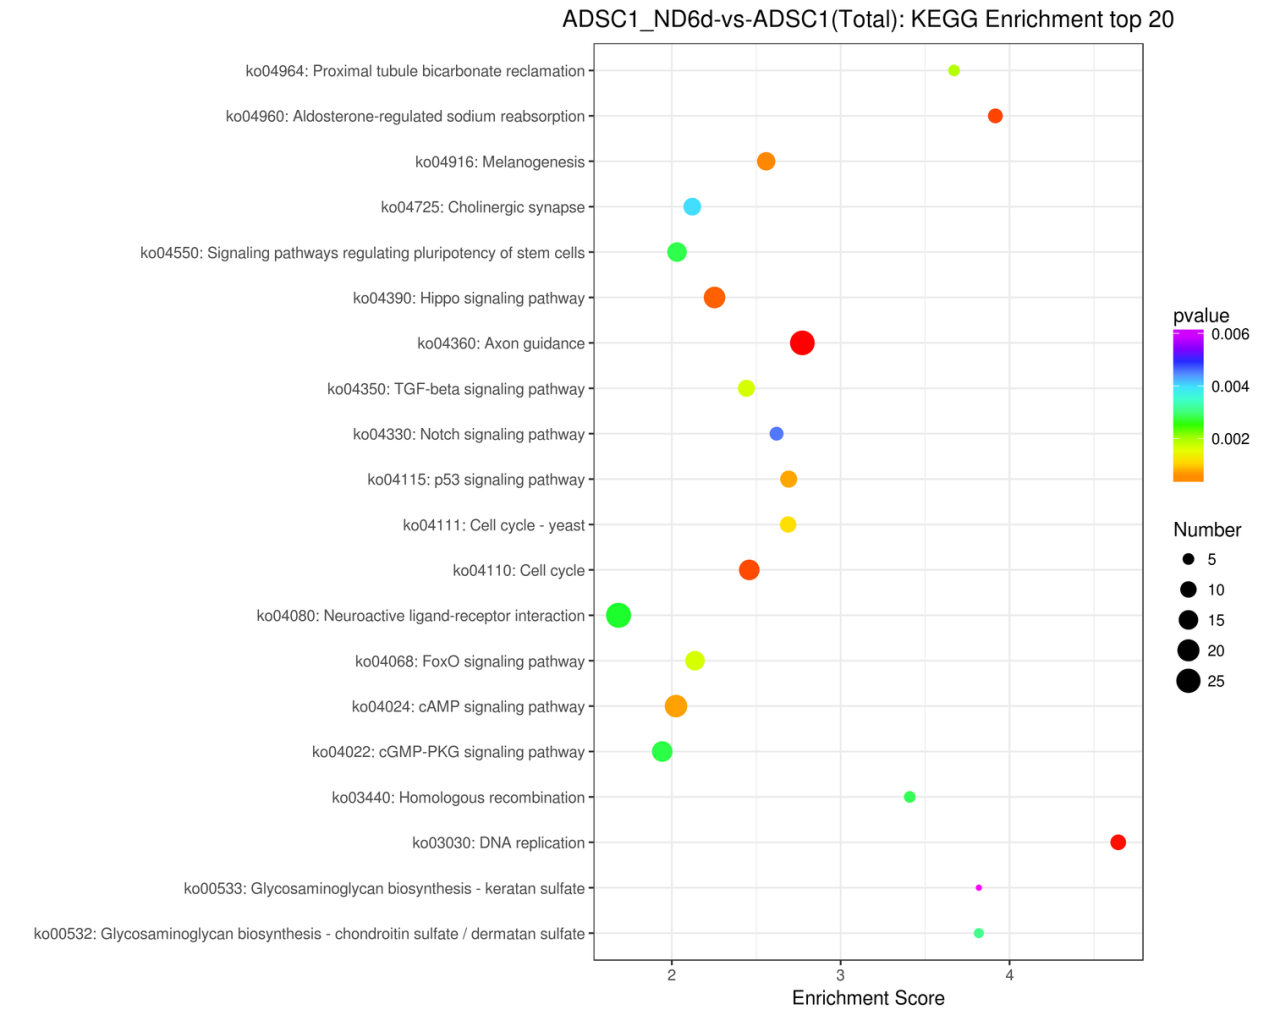

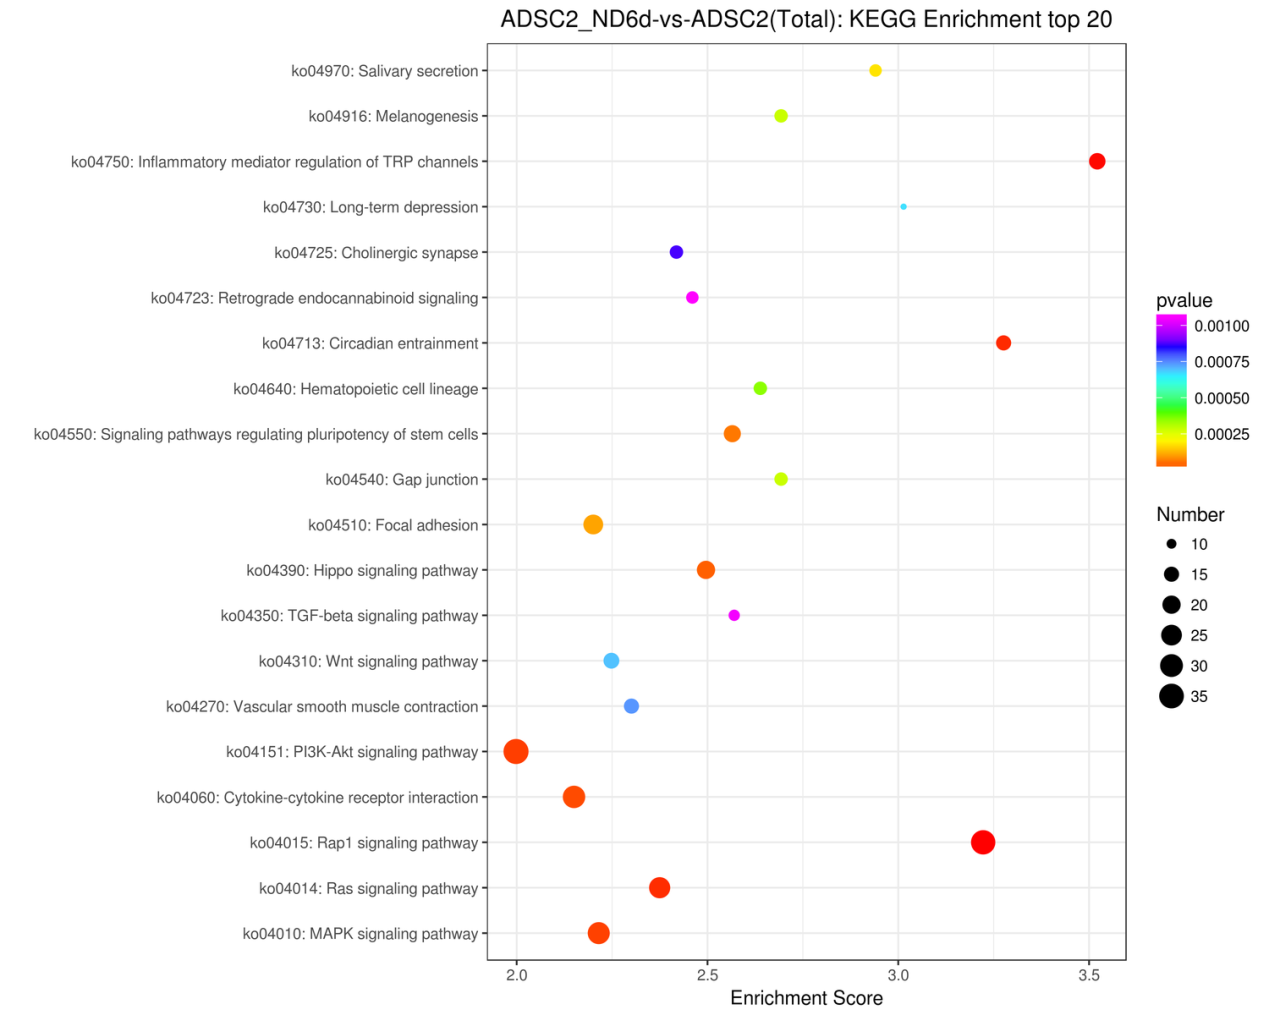

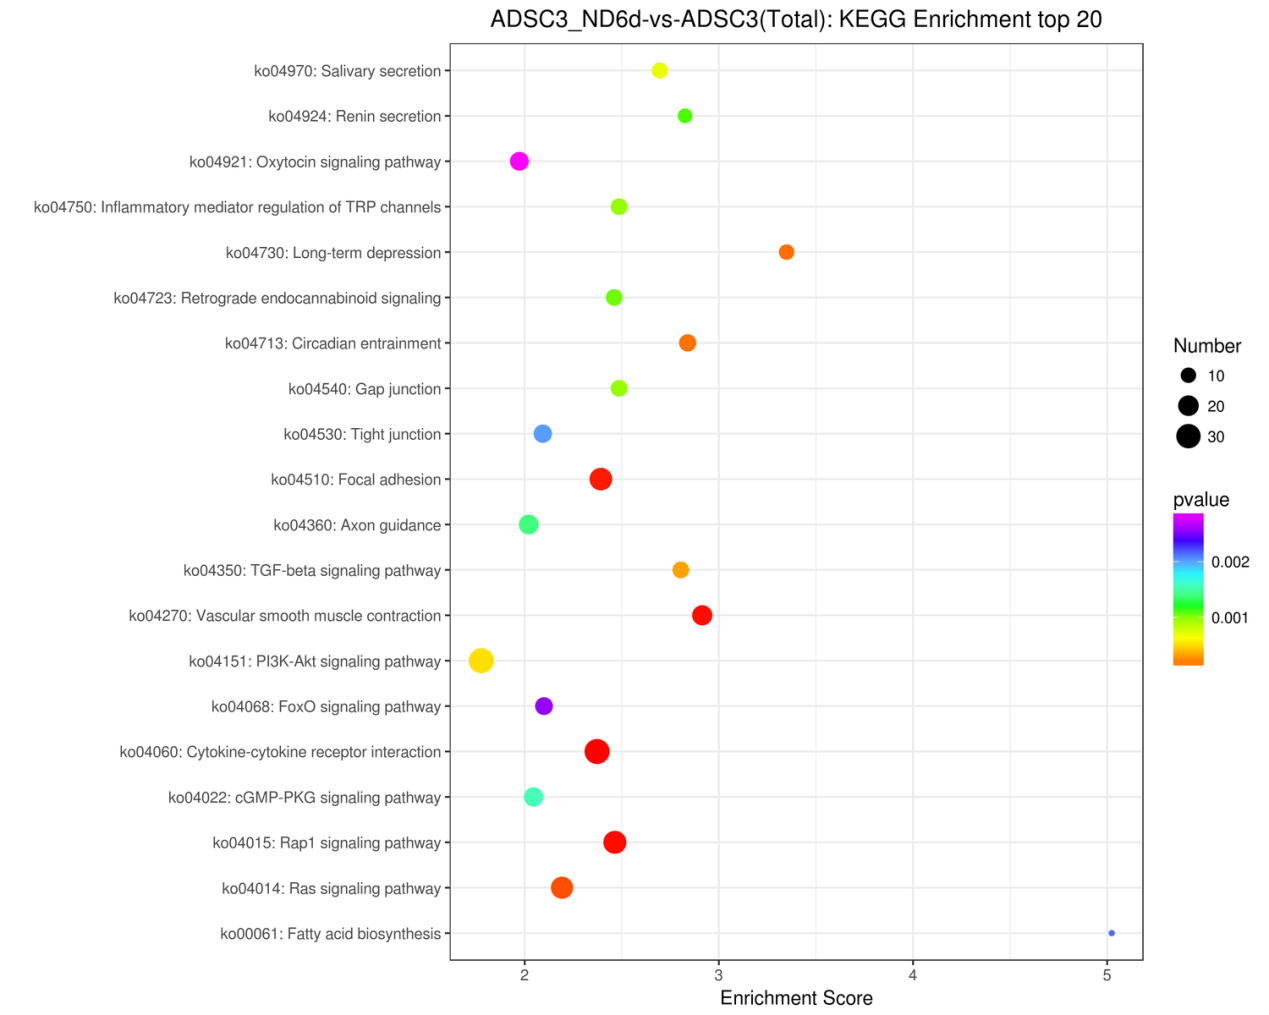


Supplementary Fig. 5: the KEGG enrichment analysis top20.

In the figure, different colors and size of bubble represent KEGG values of different ranges, and the horizontal coordinate is the enrichment score, and the vertical coordinate is the related pathway involved in the differentiation.


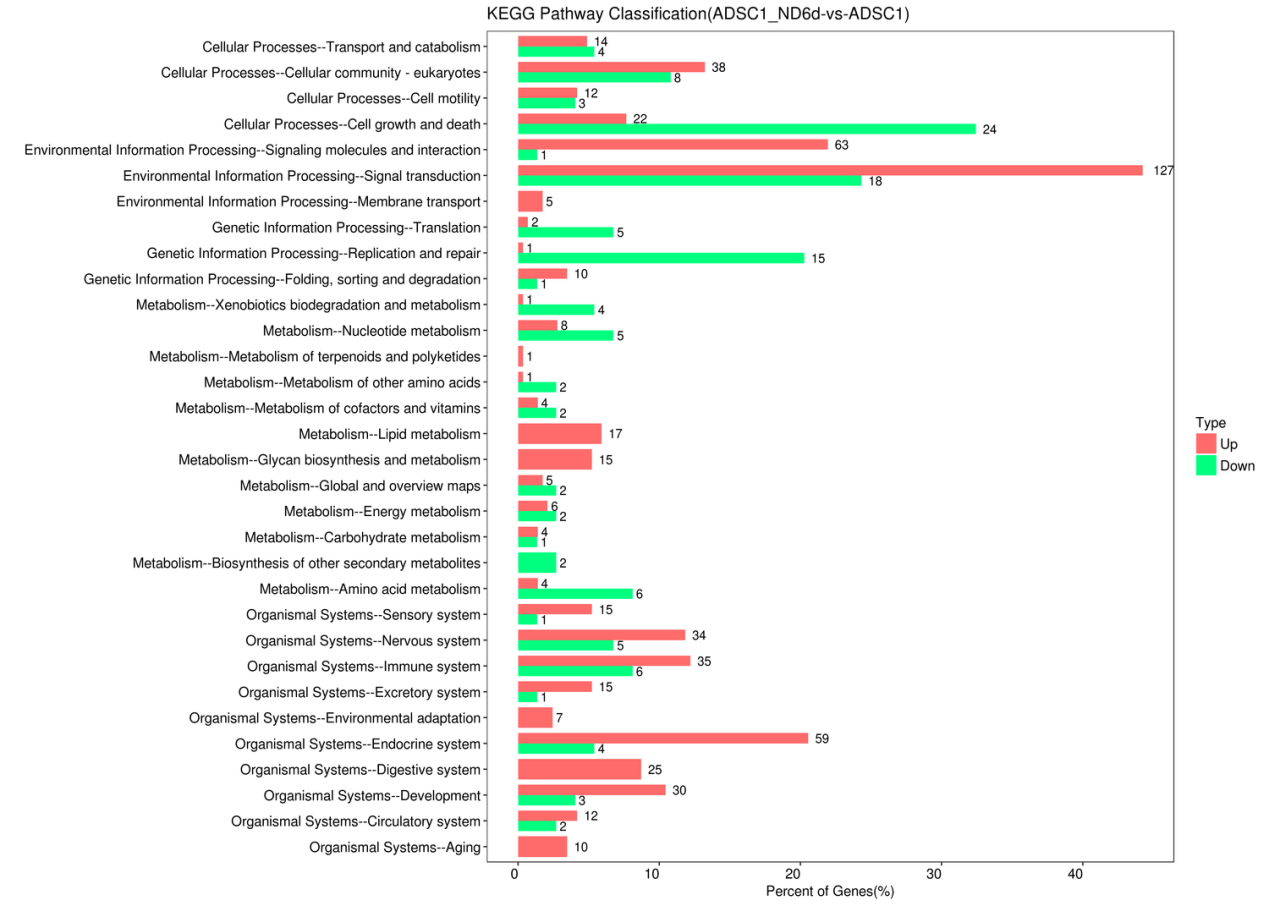

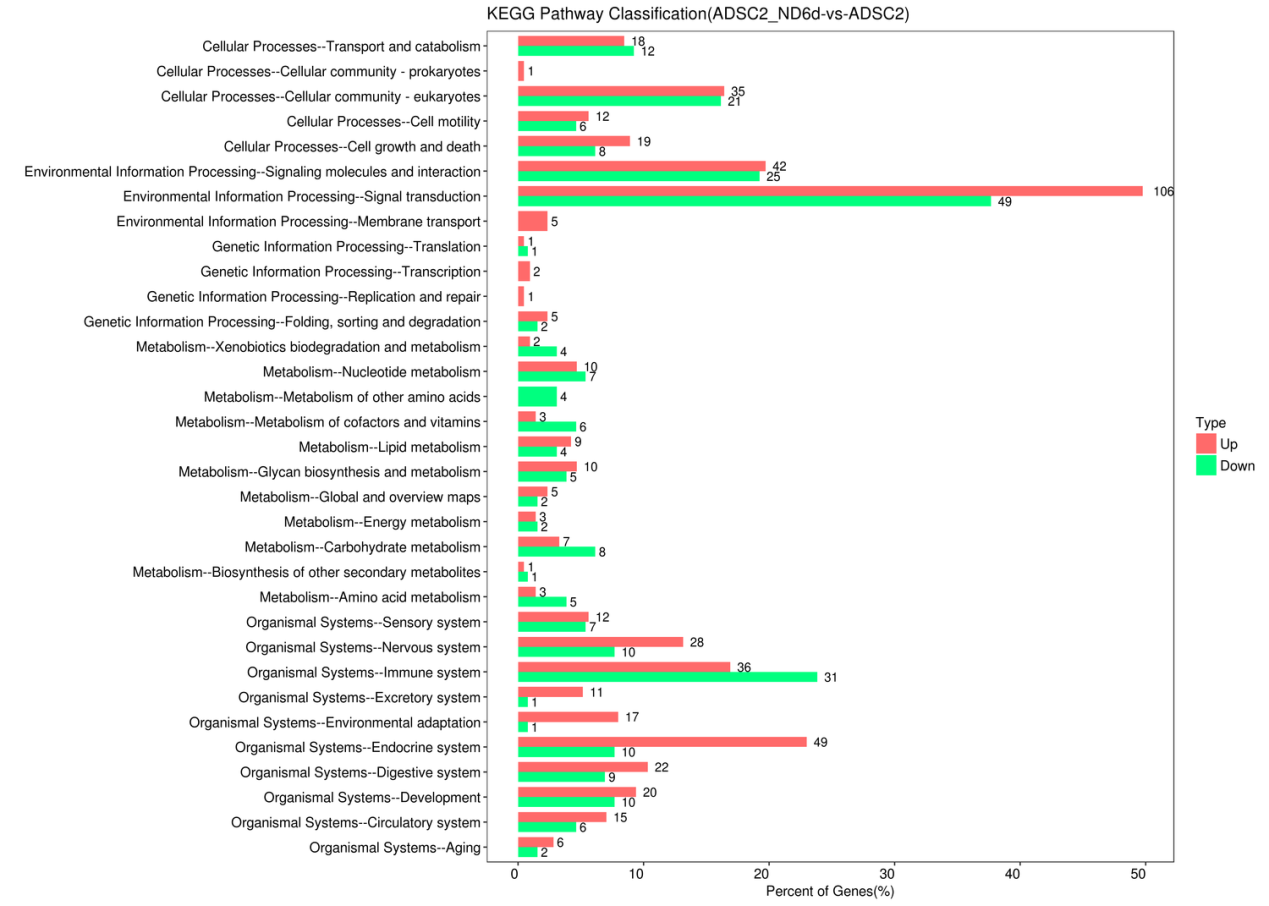

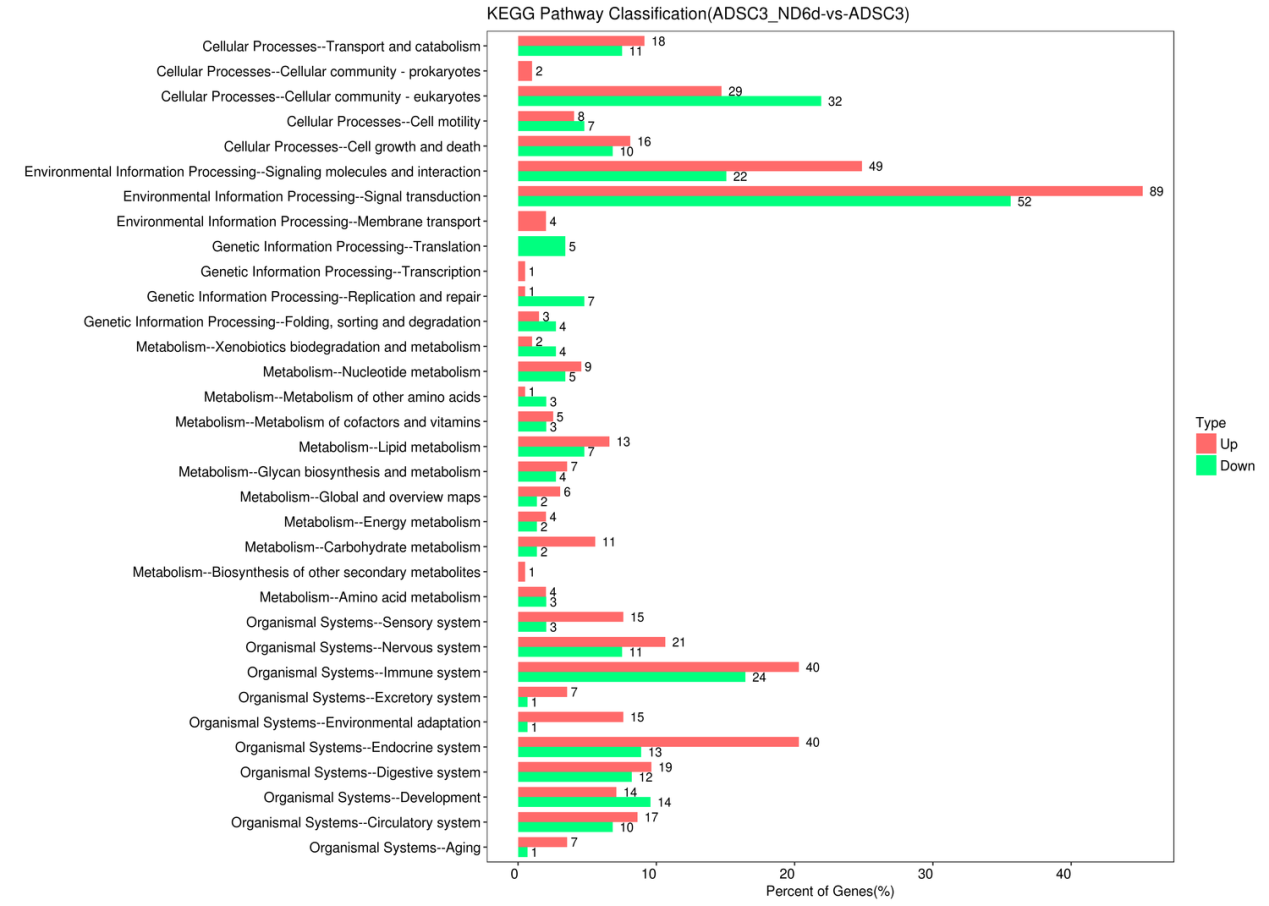


Supplementary Figure 6:

Distribution of up-regulated and down-regulated differentially expressed genes at KEGG Level2 Caption: horizontal axis are comments to the rise in Level2 stores metabolic pathways (cut) differentially expressed genes and all comments to the rise in KEGG pathways (cut) the ratio of the total number of differentially expressed genes (%), the vertical axis represents Level2 stores pathway, the name of the columns on the right side of the figures representing the annotation to the Level2 stores under the pathway of increase number of differentially expressed genes (cut).

Supplementary Fig. 7

Supplementary Fig. 8

Heatmap indicating the expression pattern across selected phenotypic groups for the most likely biomarkers.

Supplementary Fig. 9

Neurogenesis was built according to WikiPathway for ADSCs neuron-like differentiation of Cynomolgus monkey.
